# Supplementary material for: Goals, Expectations, and the Definition of Success for Neuromodulation for Pain According to Representatives of Neuromodulation Device Manufacturers
Source: MDPI journal article supplement (doi:10.3390/jpm12091457), 2022-09-06
Supplement: s1 [file s1]

## Supplementary Material SI: Survey Questions

How much experience do you have in your company?

- ☐ 0 – 1 year
- ☐ 1 – 3 years
- ☐ 3 – 5 years
- ☐ 5- 10 years
- ☐ 10 – 20 years
- ☐ More than 20 years of experience

What is your profession?

- ☐ Sales
- ☐ Clinical
- ☐ Higher management
- ☐ Other, please specify your profession: .....

What are your **goals** in treating patients with neuromodulation for pain?

Please specify your top 3 goals.

- ☐ To improve the economical values of your company
- ☐ To have a major impact on health-economical aspects
- ☐ To become a key opinion leader in innovation
- ☐ To become a trusted partner for physicians
- ☐ To provide excellent service at the highest standards for physicians
- ☐ To provide excellent service at the highest standards for patients
- ☐ To improve my personal technical / marketing / management skills
- ☐ To have superior quality / superior clinical results / etc. compared to our competitors
- ☐ To have the highest impact on national regulations
- ☐ To have the broadest portfolio in neuromodulation for pain
- ☐ Other goal, please specify: .....

What factors do you **expect** to change with neuromodulation for pain?

Please specify your top 3 goals.

- ☐ Pain intensity
- ☐ Mobility / functionality
- ☐ Pain medication use
- ☐ Sleep quality
- ☐ Capacity to return to work
- ☐ Participation in social life
- ☐ Self-esteem

- Feeling of happiness
- Patient satisfaction
- Other factors, please specify: .....

How do you **define success** of neuromodulation for pain?

.....

We thank you for your time spent taking this survey.

Your response has been recorded.
